# Supplementary material
Source: HighWire-hosted journal article supplement (https://jnm.snmjournals.org/highwire/filestream/110094/field_highwire_adjunct_files/0/263959_Supplemental_Data.pdf)
Supplement: 263959_Supplemental_Data.pdf [file 263959_Supplemental_Data.pdf]

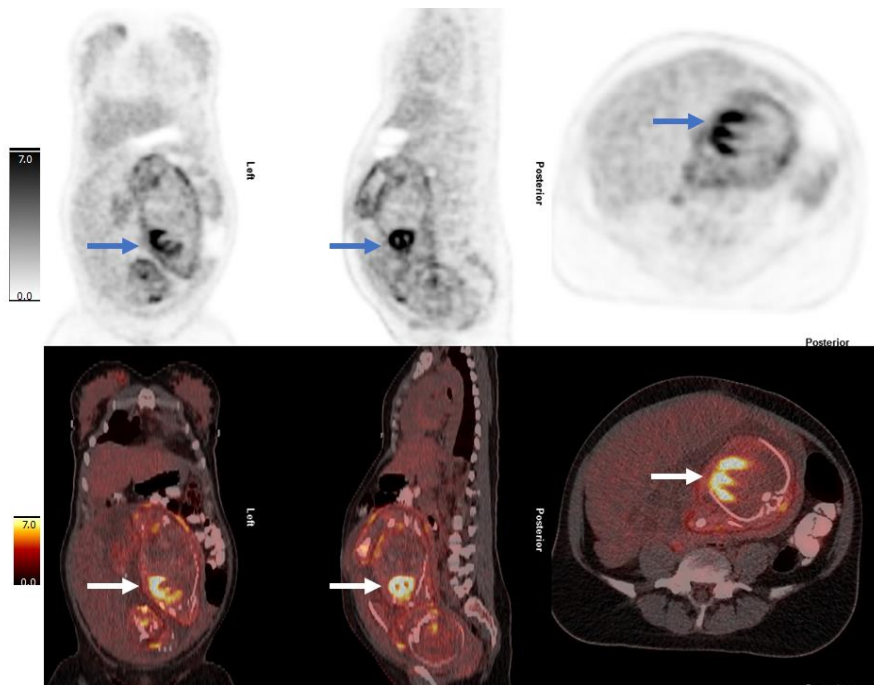

Supplemental figure 1 shows example of concentrated uptake of  $^{18}\text{F}$ -FDG in the fetal heart for patients well into the third trimester at 36 weeks.
